# Supplementary material for: Study protocol for ADAPT-TDM: A beta-lactam antibiotic Dose AdaPtation feasibility randomised controlled Trial using Therapeutic Drug Monitoring
Source: PubMed Central journal article supplement — BMJ Open. 2024 Jun 27;14(6):e083635. doi: 10.1136/bmjopen-2023-083635 (PMC11328624; doi:10.1136/bmjopen-2023-083635), 2024-06-27
Supplement: bmjopen-14-6-s002.pdf [file bmjopen-14-6-s002.pdf]

Supplementary Table 1. Study procedures

| Study Procedure |                                                    | Study Day |       |       |       |       |       |     |        | Protocol violation |
|-----------------|----------------------------------------------------|-----------|-------|-------|-------|-------|-------|-----|--------|--------------------|
|                 |                                                    | Day 0     | Day 1 | Day 2 | Day 3 | Day 4 | Day 5 | ICU | Day 30 |                    |
| Clinical        | Consent                                            | √         |       |       |       |       |       |     |        |                    |
|                 | Randomisation                                      | √         |       |       |       |       |       |     |        |                    |
|                 | Antibiotic (Meropenem or Cefepime or Piperacillin) | √         |       |       |       |       |       |     |        |                    |
|                 | Starting dose                                      | √         |       |       |       |       |       |     |        |                    |
|                 | Start date                                         | √         |       |       |       |       |       |     |        |                    |
|                 | Concomitant antibiotic use                         | √         | √     | √     | √     | √     | √     |     |        |                    |
|                 | Study antibiotic dose changed based on PK sample   |           | √     | √     | √     | √     | √     |     |        |                    |
|                 | Date of changed dose                               |           | √     | √     | √     | √     | √     |     |        |                    |
|                 | Dose accepted by treating team                     |           | √     | √     | √     | √     | √     |     |        |                    |
|                 | Dose in grams per protocol                         |           | √     | √     | √     | √     | √     |     |        |                    |

|  |                                              |   |   |   |   |   |   |   |   |  |
|--|----------------------------------------------|---|---|---|---|---|---|---|---|--|
|  | Dose in grams per TDMx*                      |   | √ | √ | √ | √ | √ |   |   |  |
|  | Date of admission to Hospital <sup>a</sup>   | √ |   |   |   |   |   |   |   |  |
|  | Date of admission to ICU                     | √ |   |   |   |   |   |   |   |  |
|  | Date of discharge from ICU                   | √ |   |   |   |   |   |   |   |  |
|  | Date of Discharge from Hospital <sup>b</sup> | √ |   |   |   |   |   |   |   |  |
|  | Study exit                                   |   |   |   |   |   | √ |   |   |  |
|  | Readmission to ICU <sup>c</sup>              |   |   |   |   |   |   |   |   |  |
|  | Mortality <sup>d</sup>                       |   |   |   |   |   |   | √ | √ |  |
|  | Cause of death <sup>e</sup>                  |   |   |   |   |   |   |   |   |  |
|  | Alive at ICU discharge                       |   |   |   |   |   |   |   |   |  |
|  | Alive at Hospital discharge                  |   |   |   |   |   |   |   |   |  |
|  | Final diagnosis                              |   |   |   |   |   |   |   |   |  |
|  | Co-morbidities                               | √ |   |   |   |   |   |   |   |  |
|  | Risk factors                                 | √ |   |   |   |   |   |   |   |  |
|  | Adverse events                               |   | √ | √ | √ | √ | √ |   |   |  |
|  | Allergies <sup>f</sup>                       | √ |   |   |   |   |   |   |   |  |
|  | Charlson Co-morbidity index <sup>g</sup>     | √ |   |   |   |   |   |   |   |  |



|  |                                           |   |   |   |   |   |   |  |  |  |
|--|-------------------------------------------|---|---|---|---|---|---|--|--|--|
|  | GGT (units/litre)                         | √ | √ | √ | √ | √ | √ |  |  |  |
|  | Bilirubin (micromol/litre)                | √ | √ | √ | √ | √ | √ |  |  |  |
|  | Creatinine (micromol/litre)               | √ | √ | √ | √ | √ | √ |  |  |  |
|  | Creatinine clearance (ml/min)             | √ | √ | √ | √ | √ | √ |  |  |  |
|  | eGFR (ml/min/1.73m <sup>2</sup> )         | √ | √ | √ | √ | √ | √ |  |  |  |
|  | White cell count (10 <sup>9</sup> /litre) | √ | √ | √ | √ | √ | √ |  |  |  |
|  | Neutrophil Count (10 <sup>9</sup> /litre) | √ | √ | √ | √ | √ | √ |  |  |  |
|  | CRP (mg/L)                                | √ | √ | √ | √ | √ | √ |  |  |  |
|  | PK sampling <sup>g</sup>                  |   | √ | √ | √ | √ | √ |  |  |  |

\*TDMx is an open access precision dosing software platform; <sup>a, b</sup>To calculate hospital and Intensive care unit (ICU) length of stay; <sup>c</sup>Readmission after study exit (after day 5) – at any point during current admission to hospital; <sup>d</sup>at any point during ICU admission, or at day 30;

<sup>e</sup> Infection/sepsis related or other; <sup>f</sup> pre-existing allergies to antibiotics and newly developed during current admission; <sup>g</sup> calculated from points given to co-morbidities; <sup>h</sup> if organism isolated, site, type and MIC; <sup>i</sup> change is Sequential organ failure assessment (SOFA) score; <sup>j</sup> invasive ventilation, extra-corporeal membrane oxygenation (ECMO), renal replacement therapy, vasopressors; PK, pharmacokinetic; APACHE, Acute physiology and chronic health evaluation; ALT, alanine transaminase; AST, aspartate transaminase; GGT, gamma glutamyl transferase; eGFR, estimated glomerular filtration rate; CRP, C-reactive protein.
