# Supplementary material for: Study protocol for ADAPT-TDM: A beta-lactam antibiotic Dose AdaPtation feasibility randomised controlled Trial using Therapeutic Drug Monitoring
Source: PubMed Central journal article supplement — BMJ Open. 2024 Jun 27;14(6):e083635. doi: 10.1136/bmjopen-2023-083635 (PMC11328624; doi:10.1136/bmjopen-2023-083635), 2024-06-27

## Appendix A: TDMx

### Patient module

In the patient module, all patient-related information is provided such as patient covariates incl. the susceptibility of the target pathogen. With this basic information the user can already use the 'Probabilistic dosing' module of TDMx. Furthermore, the user can enter any dosing regimen of the drug of interest along with drug measurements to obtain the individual pharmacokinetic profile based on Bayesian feedback in the 'Bayesian dosing' module. Note that the precise appearance of the module is drug dependent.

TDMx for Meropenem

Disclaimer 1. Patient 2. Probabilistic Dosing 3. Bayesian Dosing 4. Optimise Sampling Advanced Opt. ▾

**Demographics**

Age [yrs.] Weight [kg] Height [cm]  
35 70 170

Sex  
male ▾

Dose [mg] | Infusion dur. [h]

| Time             | Dose | Duration |
|------------------|------|----------|
| 09/11/2017/06:00 | 1000 | 1        |

+ -

Dosing Interval (for next dose) [h]  
8

**Laboratory**

Serum creatinine [mg/dL]

| Time             | cCreatinine |
|------------------|-------------|
| 09/11/2017/13:00 | 0.7         |

+ -

MIC [mg/L]  
2

Measured meropenem [mg/L]

| Time             | cMeropenem |
|------------------|------------|
| 09/11/2017/13:00 |            |

+ -

Protein Binding [%]  
2

Time [dd/mm/yyyy/hh:mm]  
Dose [mg]  
Infusion duration [h]  
cMeropenem [mg/L]

Prediction for typical patient based on entered record/covariates

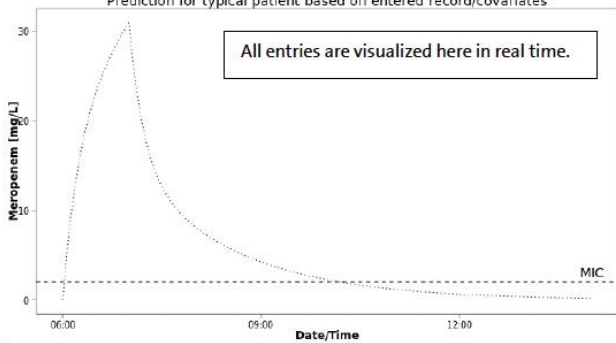

All entries are visualized here in real time.

Patient data and dosing record. Entering a dosing record is only required for Bayesian Dosing. Further doses can be added by '+' and removed by '-'. The dosing interval field indicates when the next dose is added in relation to the last entry in the table. Any entry can be modified by typing into the respective field.

All laboratory information is gathered here. While serum creatinine, a (guesstimate) MIC and protein binding is required in any case, the measured drug concentration is only required for Bayesian Dosing.

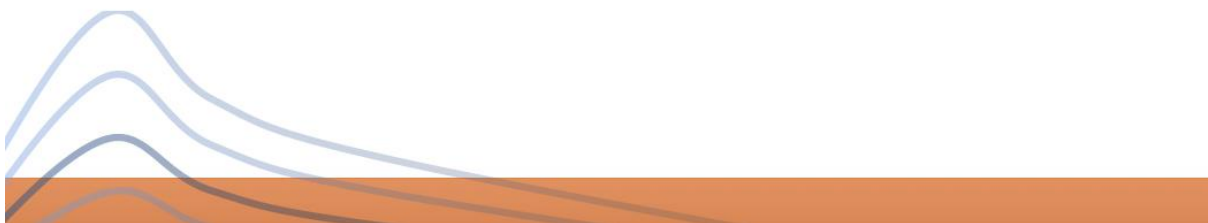

Supplement: bmjopen-14-6-s003.pdf [file bmjopen-14-6-s003.pdf]
